# Supplementary material for: Synthesis, characterization and stress-testing of a robust quillaja saponin stabilized oil-in-water phytocannabinoid nanoemulsion
Source: Springer Nature journal article supplement (doi:10.1186/s42238-021-00094-w), 2021-09-23
Supplement: MOESM1 [file 42238_2021_94_MOESM1_ESM.pdf]

## Supplementary information for Synthesis and characterization of a robust quillaja saponin stabilized oil-in-water phytocannabinoid nanoemulsion

**A. Banerjee, R. Salama**

*Department of Chemistry and Biochemistry, University of Windsor, 401 Sunset  
Ave. Windsor, ON N9B 3P4 Canada*

**J. Binder**

*Peak Processing Solutions, Tecumseh, Ontario, N0R 1L0 Canada*

**J. F. Trant\***

*Department of Chemistry and Biochemistry, University of Windsor, 401 Sunset  
Ave. Windsor, ON N9B 3P4 Canada*

\* E-mail: [john.trant@uwindsor.ca](mailto:john.trant@uwindsor.ca)

Table S1: Cannabinoid composition of  $CD_{CBD}$ 

| Phytocannabinoid                 | Concentration (mg/g) |
|----------------------------------|----------------------|
| $\Delta^9$ -Tetrahydrocannabinol | 69.0                 |
| Cannabidiol                      | 632                  |
| Cannabigerol                     | 7.0                  |
| Cannabinol                       | 5.3                  |
| Cannabichromene                  | 22.3                 |

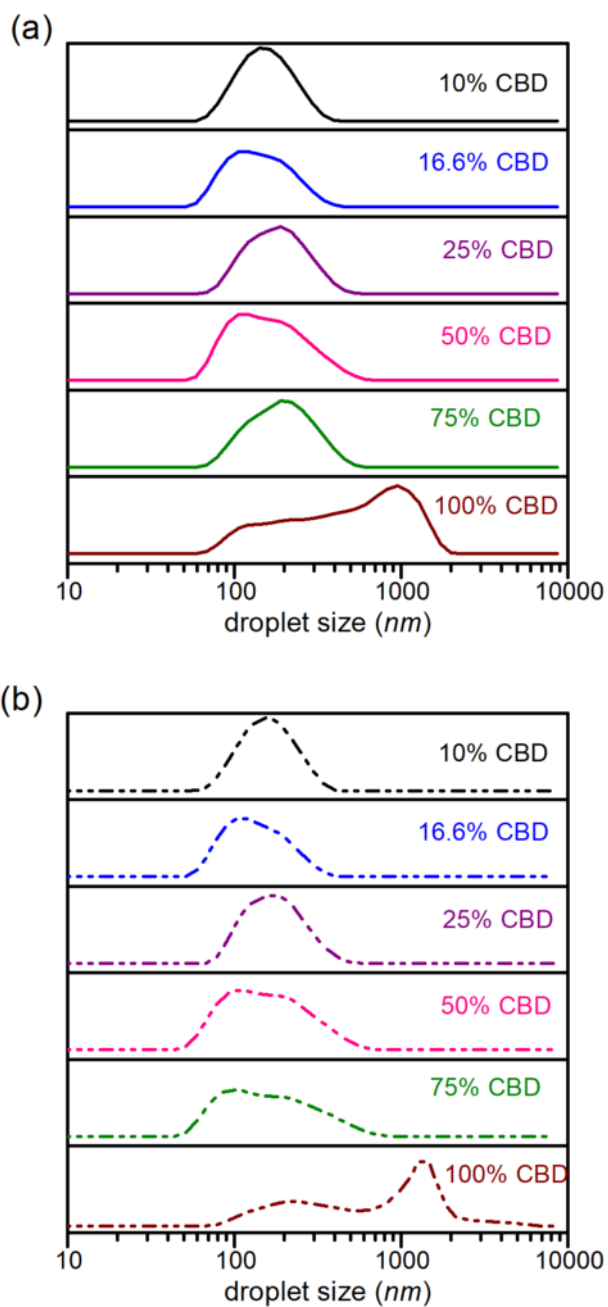

Figure S1: Droplet size distribution profile of a mixture of  $CD_{CBD}$  and soybean oil dispersed in water - (a) as-produced and (b) after one week of storage. Total lipid phase was 10 wt%, and 10 wt% QNaturale<sup>®</sup> was used as emulsifier.

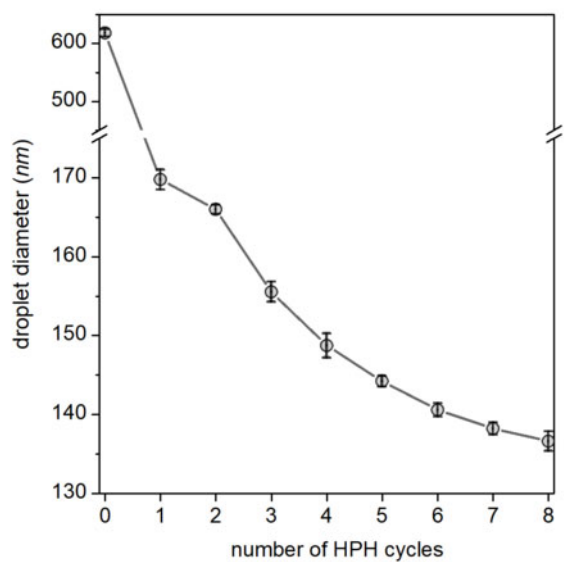

Figure S2: Variation of  $d_z$  of the optimized  $CD_{CBD}$  nanoemulsion with the number of homogenization cycles.

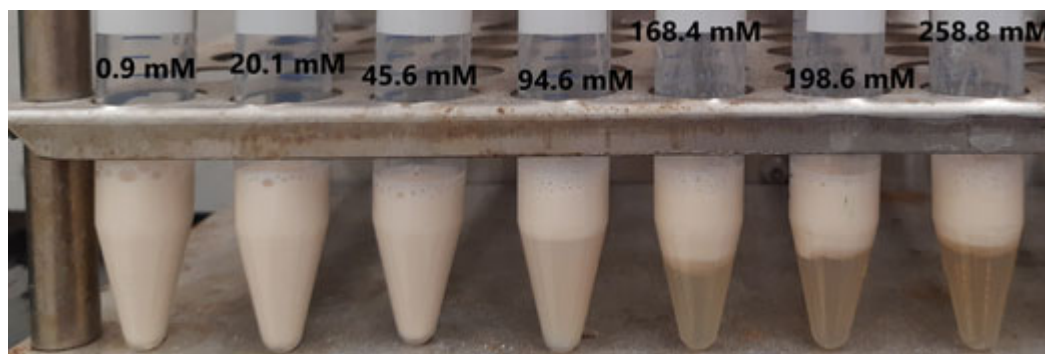

Figure S3: Optimized nanoemulsion with varying concentrations of  $CaCl_2 \cdot 2H_2O$  from  $\sim 1$  mM to  $\sim 250$  mM; after 18 h incubation. Exact concentrations are mentioned in the figure.

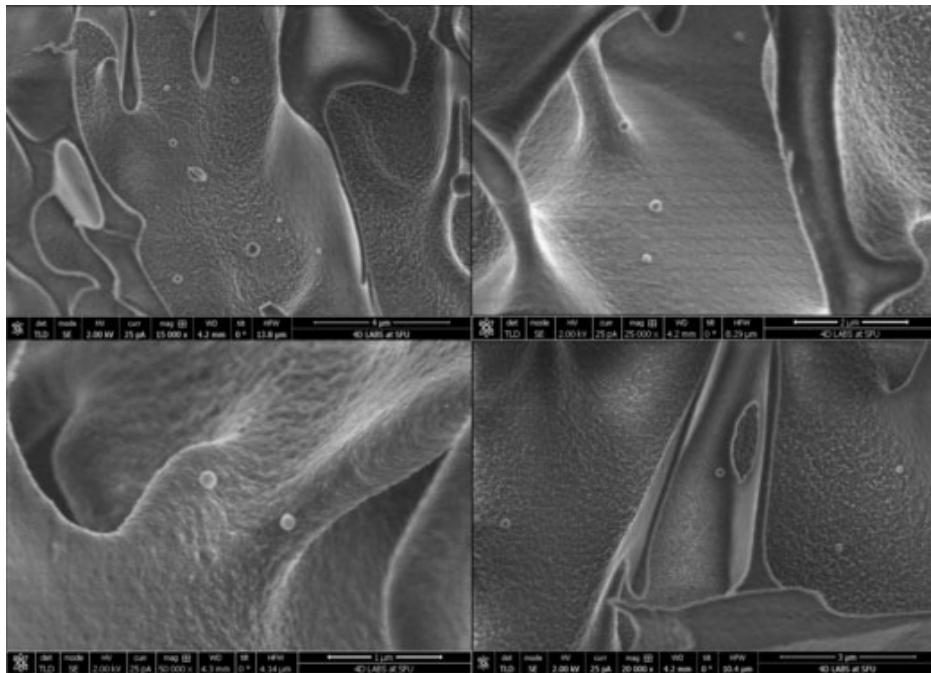

Figure S4: Optimized nanoemulsion with varying concentrations of  $\text{CaCl}_2 \cdot 2\text{H}_2\text{O}$  from  $\sim 1$  mM to  $\sim 250$  mM; after 18 h incubation. Exact concentrations are mentioned in the figure.

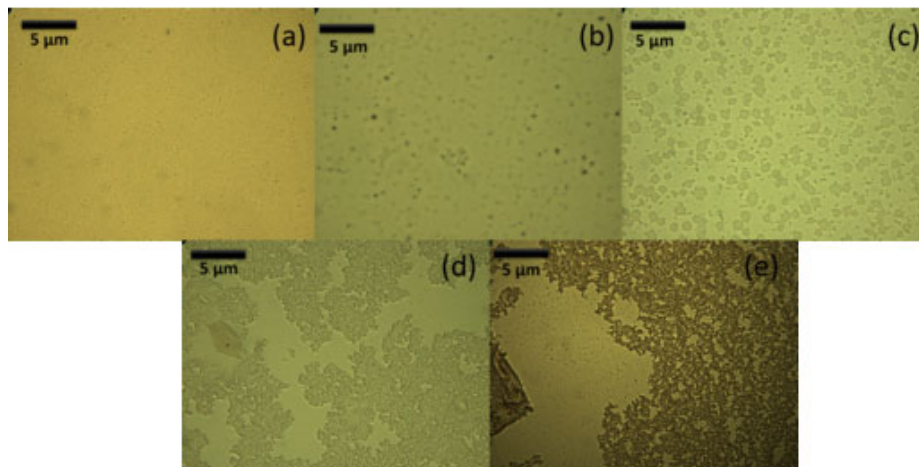

Figure S5: Optical micrographs of optimized nanoemulsion (a) as-prepared, at pH 3.8, without additives; (b) in the presence of 400 mM sucrose; (c) in the presence of 100 mM  $\text{CaCl}_2 \cdot 2\text{H}_2\text{O}$ ; (d) in the presence of 200 mM  $\text{CaCl}_2 \cdot 2\text{H}_2\text{O}$ ; (e) at pH 1.6.

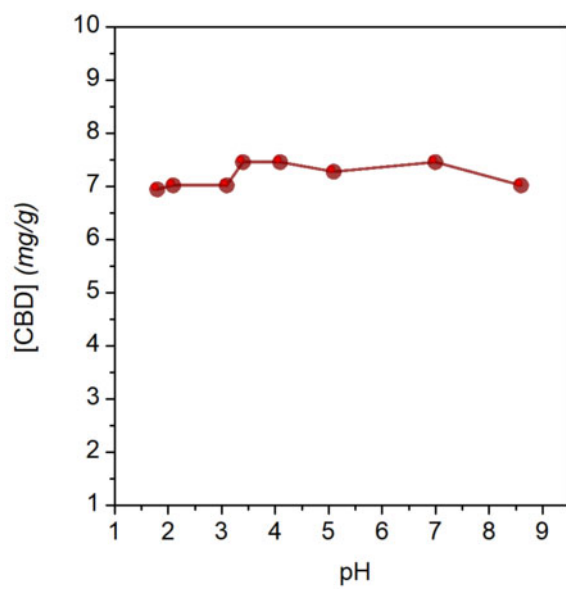

Figure S6: Variation in CBD concentration in optimized nanoemulsion as a function of pH.
